# Supplementary material
Source: publisher figshare collection journal article supplement (https://sage.figshare.com/ndownloader/files/14652038)
Supplement: Supplementary file 1 [file 14652038]

## Information about the Survey Itself

**This page has information and questions devoted to how the survey was administered.**

1. Did this person consent to taking the survey? (If YES, proceed)

☐ Yes

☐ No

2. Has this person lived in this location for at least six months? (If YES, proceed)

☐ Yes

☐ No

3. Survey Number

Country Code Your Initials Number (always two digits) e.g. USRS01

4. Place of Interview

5. Date of Interview (MM/DD/YY)

6. Time of Interview

7. Interviewer's Name

8. Field checked by:

9. Is the respondent

☐ Female

☐ Male

## Instructions for Interviewer

### Instructions for Questions 11-16

- Please write EXACTLY what the respondent says for each question.
  - If you can capture the EXACT WORDS, enclose them in quotes (" ").
  - If you can't capture the exact words and need to write a synopsis, please enclose in angle brackets (< >)
- 

### Instructions for Questions 11 and 14

You need to elicit a response for each body part. Begin by allowing the respondent to just answer the question and record their response in the appropriate space. Mark the order in which responses were stated. Once the respondent has stopped, begin probing for the remaining body parts that were not previously mentioned. Circle each of the body parts that needed to be probed. Use only the approved probes.

Here is an example interview transcript and how it might be recorded:

Interviewer: Think of a man that is unclean in a socially unacceptable way. What does he look like? What is it about him that makes him unclean?"

Respondent: Oily and matted hair. Torn clothes, patched up clothes. Bad teeth, you know like yellow or they're missing some teeth, probably have bad breath. They're probably wearing old or used shoes. Their feet are smelly. They have dirty, unkempt fingernails, dirt under their fingernails. Ummmm...yeah, that's it.

Interviewer: Ok. How could you tell that his underarms are unclean?

Respondent: They wouldn't smell too good.

Interviewer: What would his face look like?

Respondent: He probably has red eyes and a runny nose. His face is sunken in, I mean like his cheeks, you know?

Interviewer: OK. What would his skin look like?

Respondent: Visibly dirty.

Here is how that interview might be recorded:

|                                            |                                                   |
|--------------------------------------------|---------------------------------------------------|
| Hands                                      | 5 "dirty, unkempt fingernails, dirt under nails"  |
| Feet                                       | 4 <old, used shoes> "smelly"                      |
| Underarms                                  | "wouldn't smell too good"                         |
| Face<br>(including<br>eyes, ears,<br>nose) | "red eyes" "runny nose" <sunken in - cheeks>      |
| Mouth                                      | 3 "bad teeth" <yellow, missing teeth, bad breath> |
| Skin                                       | "visibly dirty"                                   |
| Hair                                       | 1 "oily and matted hair"                          |
| Clothing                                   | 2 "torn clothes, patched up clothes"              |

Please rotate between asking about men first and asking about women first (i.e. on some surveys start with Question 11 and on others, start with Questions 14, 15, and 16 and then return to 11-13.)

10. Which gender did you start with?

☐

Man

☐

Woman

11. Think of a man that is unclean in a socially unacceptable way. What does he look like? What is it about him that makes him unclean?

Acceptable Probes:

"What would his \_\_\_\_ look like?"

"How could you tell that his \_\_\_\_ is/are unclean?"

Hands

Feet

Underarms

Face

(including  
eyes, ears,  
nose)

Mouth

Skin

Hair

Clothing

12. Again, imagine the man you described above. Who is this person? What do you think of him? What can you tell me about him?

13. If you had to label this person, what would you call him?

Instructions for Interviewer: Elicit for at least FIVE LABELS. Please keep probing until you get 5.

Acceptable Probes:

"What else can you think of?"

"What other words might someone use to describe him?"

"But if you had to label him, what word would you choose?"

1

2

3

4

5

6

7

8

9

10

14. Imagine a woman that is unclean in a socially unacceptable way. What does she look like? What is it about her that makes her unclean?

Acceptable Probes:

"What would her \_\_\_\_ look like?"

"How could you tell that her \_\_\_\_ is/are unclean?"

Hands

Feet

Underarms

Face

(including  
eyes, ears,  
nose)

Mouth

Skin

Hair

Clothing

15. Again, imagine the woman you described above. Who is this person? What do you think of her? What can you tell me about her?

16. If you had to label this person, what would you call her?

Instructions for Interviewer: Elicit for at least FIVE LABELS. Please keep probing until you get 5.

Acceptable Probes:

"What else can you think of?"

"What other words might someone use to describe her?"

"But if you had to label her, what word would you choose?"

1

2

3

4

5

6

7

8

9

10



## About you

17. Were you born in this country?

- ☐ Yes
- ☐ No
- ☐ Don't know/Refuse to answer

18. In what year were you born?

19. Where do you live now? (Town or city)

20. How long have you lived in your CURRENT town/village/suburb/city? Please enter the number of years. If less than a year, please enter the number of months.

Years

Months

21. What is your marital status?

- ☐ Single
- ☐ Married
- ☐ Divorced
- ☐ Widowed

Other (please specify)

22. What is the highest level of school you have had the chance to complete?

- ☐ Primary school
- ☐ Secondary School
- ☐ High School
- ☐ University or technical training (e.g., nurse)
- ☐ Graduate/professional school (e.g., Master's degree, Ph.D., M.D., J.D., etc)

23. Please list your current occupation or how you earn money. If you are an administrative assistant, student, lab technician, or similar position, please indicate what industry you work for. For example, if you are a student, specify your field of study. If you are an administrative assistant, please specify what type of office (e.g., dentist, marketing company, etc.).

24. Ethnic group

25. Political affiliation

26. Religious affiliation

27. How often do you attend religious services?

- ☐ More than once a week
- ☐ Once a week
- ☐ Monthly
- ☐ Several times a year
- ☐ Never

28. Are you:

- ☐ Male
- ☐ Female

29. How many people live in your current household? ('Living in your household' means anyone who slept and ate meals there for at least two weeks of the previous month)

30. Does your household have any of the following items?

(Check all that apply)

- ☐ Television
- ☐ Car
- ☐ Air Conditioning
- ☐ Computer
- ☐ Internet access
- ☐ Mobile telephone with internet access (i.e. smartphone)

31. Which of the following best describes your household food in the past 12 months?

- ☐ We always have enough to eat and it is the kinds of food we want
- ☐ We have enough to eat but it isn't always the kinds of food we want
- ☐ Sometimes we don't have enough to eat
- ☐ Often we don't have enough to eat

32. Which of the following best describes your household water in the past 12 months?

- ☐ We usually or always have enough water, and the water is good quality
- ☐ We usually or always have enough water, but the water is poor quality
- ☐ We rarely or never have enough water, but the water is good quality
- ☐ We rarely or never have enough water, and the water is poor quality

33. Do you have access to any of the following? (Check all that apply)

- ☐ Hot running water in your house
- ☐ Cold running water in your house
- ☐ Water from a courtyard tap
- ☐ Water from a community tap

34. If none of the above, where do you get your water?

35. How many places do you have in your house where you can wash your hands with soap? (For example, sink, tap, basin, etc.)

- ☐ 1
- ☐ 2
- ☐ 3
- ☐ 4
- ☐ 5 or more

36. How often is soap easily available to wash hands in your home?

- ☐ Always
- ☐ Usually
- ☐ Sometimes
- ☐ Occasionally
- ☐ Rarely or Never

37. How would you describe your health status?

|                                   | Very good             | Quite good            | Neither good nor<br>poor | Poor                  | Quite poor            |
|-----------------------------------|-----------------------|-----------------------|--------------------------|-----------------------|-----------------------|
| General Health                    | <input type="radio"/> | <input type="radio"/> | <input type="radio"/>    | <input type="radio"/> | <input type="radio"/> |
| Mental Health                     | <input type="radio"/> | <input type="radio"/> | <input type="radio"/>    | <input type="radio"/> | <input type="radio"/> |
| Oral Health (teeth,<br>gums, etc) | <input type="radio"/> | <input type="radio"/> | <input type="radio"/>    | <input type="radio"/> | <input type="radio"/> |

Think of this ladder as representing where people stand in their communities.

People define community in different ways; please define it in whatever way is most meaningful to you. At the top of the ladder are the people who have the highest standing in their community. At the bottom are the people who have the lowest standing in their community.

Where would you place yourself on this ladder?

Please place a large "X" on the rung where you think you stand at this time in your life, relative to other people in your community.

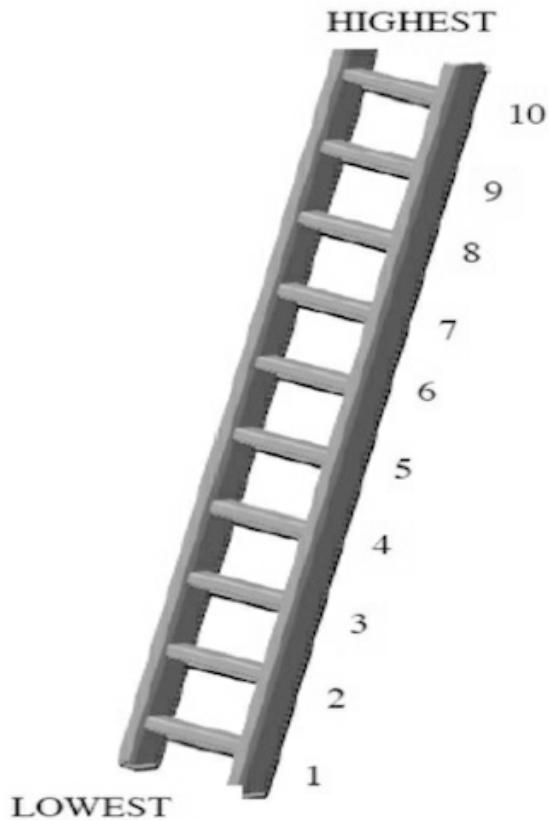

Think of this ladder as representing where people stand in your country.

At the top of the ladder are the people who are the best off - those who have the most money, the most education and the most respected jobs. At the bottom are the people who are the worst off - who have the least money, least education, and the least respected jobs or no job. The higher up you are on this ladder, the closer you are to the people at the very top; the lower you are, the closer you are to the people at the very bottom.

Where would you place yourself on this ladder?

Please place a large "X" on the rung where you think you stand at this time in your life, relative to other people in your country.

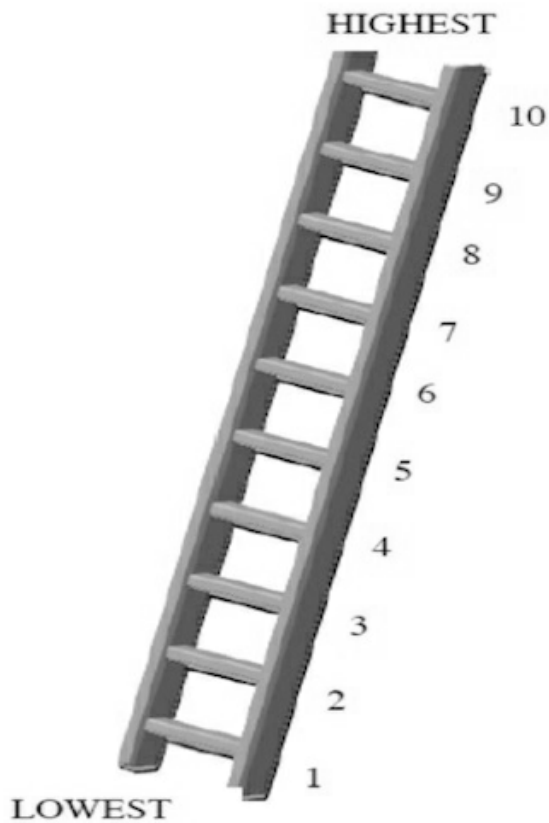

## Interviewer Feedback Form

38. Name of interviewer:

39. How long did the interview take (number of minutes)?

40. Did the respondent show...  
(check all that apply)

- ☐ mistrust of you or the study
- ☐ dishonesty, lying, or inventing responses that didn't seem true
- ☐ fear of you or the study
- ☐ hostility, anger, or resentment
- ☐ evasion or trying to avoid answering

41. If you marked any of the above, please explain.

42. Were there any interruptions or distractions?

- ☐ No
- ☐ Yes but I don't think it influenced responses
- ☐ Yes and I think that the interruptions influenced the answers

43. If you marked yes, please describe the nature of the interruptions/distractions.

44. Was the respondent unable to understand specific words or phrases? If no, just write "No." If yes, please list what they were.

45. Was the respondent unable to understand a task in the survey? If no, just write "No." If yes, please write what it was.

46. Did the respondent appear to answer in an unreliable way? If so, how?

47. Did you have any trouble establishing rapport (i.e., good communication) with this respondent? If yes, what did you improve to improve rapport? (Did it work?) If no, what could have been done to improve rapport (if anything)?

48. What is your overall assessment of the quality of the data in this survey?

- ☐ Excellent. The respondent understood the survey and was engaged and there were no interruptions.
- ☐ Just okay. The participant may not have understood all or part of the survey well or there were some interruptions.
- ☐ Suspect. The participant misunderstood the survey or did not participate well or there were many interruptions.

49. The quality of the data from this interview is really important to us. What else do we need to know?
